# Supplementary material
Source: HighWire-hosted journal article supplement (https://bmjpaedsopen.bmj.com/content/3/1/e000571)
Supplement: inline-supplementary-material-1 [file inline-supplementary-material-1.pdf]

**Supplementary Table 1: Summary of key group study design features and topical areas used in the narrative review.**

| Study Design Features                                                                                                                                                                                                                             | Topic Areas                                                                                                                                                                                                                                                                                                                                                                                                                                                                                                                                                                             |
|---------------------------------------------------------------------------------------------------------------------------------------------------------------------------------------------------------------------------------------------------|-----------------------------------------------------------------------------------------------------------------------------------------------------------------------------------------------------------------------------------------------------------------------------------------------------------------------------------------------------------------------------------------------------------------------------------------------------------------------------------------------------------------------------------------------------------------------------------------|
| Cluster randomized trial<br>Cross-sectional<br>Dissertation<br>Individually randomized trial<br>Longitudinal<br>Metanalysis<br>Multiple level intervention<br>Perspective<br>Review<br>Single level intervention<br>Study protocol<br>Qualitative | Agricultural Practices<br>Behavior Change<br>Breast Feeding Practices<br>Catch-Up Growth<br>Community Perceptions<br>Double Burden of Malnutrition<br>Early Child Development<br>Economic Productivity<br>Educational Attainment<br>Gender Related<br>Implementation Science<br>Infection-Nutrition Interaction<br>Intergenerational Effects<br>Intrauterine Environment<br>Medical Disorders<br>Micronutrients<br>Migration<br>NCD Risk Factors<br>Obesity<br>Policy<br>Secular Trend<br>Socio-Demographic Correlates<br>Supplementary/Complementary Feeding<br>WASH<br>Women's Health |
