# Supplementary material
Source: HighWire-hosted journal article supplement (https://bmjpaedsopen.bmj.com/content/3/1/e000571)
Supplement: inline-supplementary-material-3 [file inline-supplementary-material-3.pdf]

**Supplementary Table 3: Different programmatic levels of nutrition intervention, including interventions addressing both the immediate (nutrition specific) and underlying (nutrition sensitive) determinants of growth. Adapted from Ruel and Alderman (2013) and Hossain et al. (2017).**

|                                                                                                                                                                                                                                                                                                                                                                                                                                                                                                                                        |
|----------------------------------------------------------------------------------------------------------------------------------------------------------------------------------------------------------------------------------------------------------------------------------------------------------------------------------------------------------------------------------------------------------------------------------------------------------------------------------------------------------------------------------------|
| <p><b>Nutrition Specific Interventions</b></p> <ul style="list-style-type: none"><li>• Maternal health and nutrition</li><li>• Maternal diet or micronutrient supplementation</li><li>• Promotion of adequate breastfeeding</li><li>• Complementary and responsive feeding practices</li><li>• Diet supplementation, fortification, and micronutrient provision for children</li><li>• Treatment of severe acute malnutrition</li><li>• Disease prevention and management</li><li>• Support for nutrition during emergencies</li></ul> |
| <p><b>Nutrition Sensitive Interventions</b></p> <ul style="list-style-type: none"><li>• Agriculture and food security</li><li>• Investments in social safety net</li><li>• Promotion of optimal early child development</li><li>• Caregiver mental health</li><li>• Gender equity and women's empowerment</li><li>• Child protection services</li><li>• Educational system strengthening</li><li>• Water and sanitation interventions</li><li>• Primary health care and family planning</li></ul>                                      |
